# Supplementary material
Source: PubMed Central journal article supplement (PMC3129036)
Supplement: NIHMS298397-supplement-Figs_S1_S2.pdf [file NIHMS298397-supplement-Figs_S1_S2.pdf]

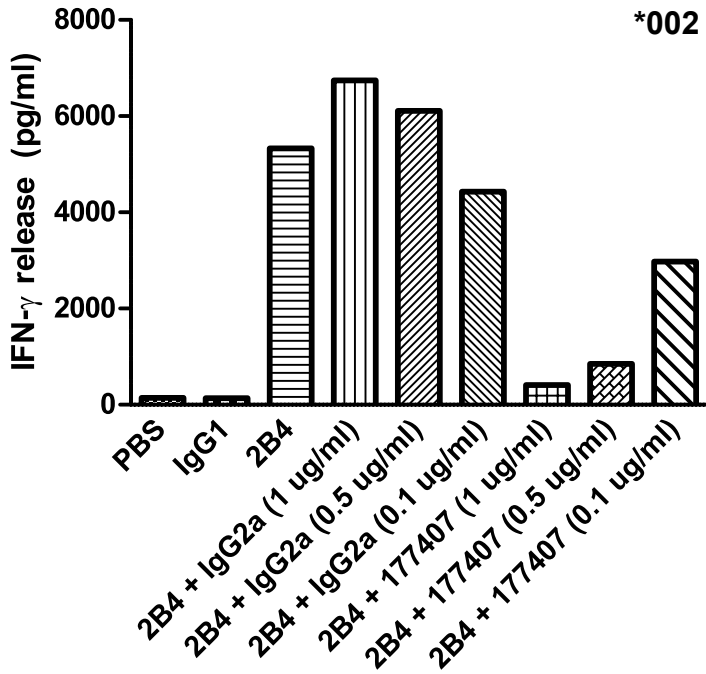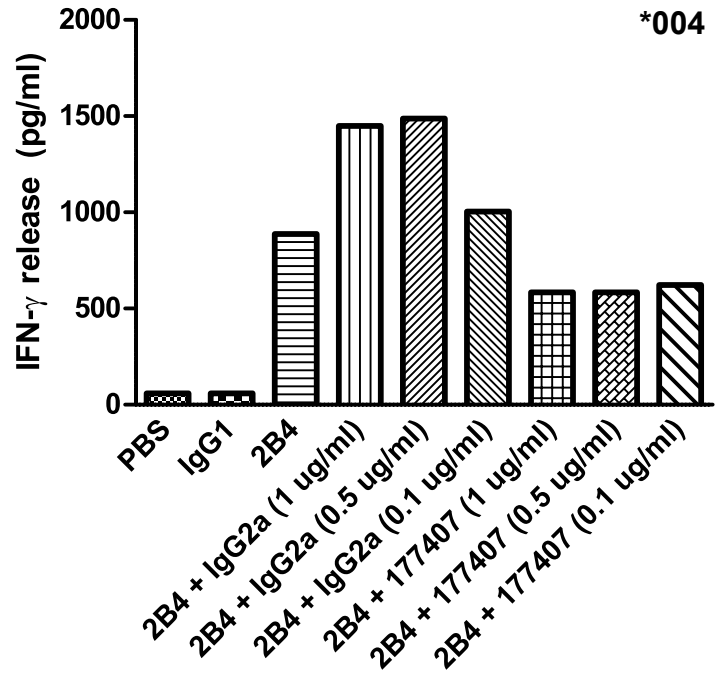

*Supplemental Figure 1 Example of IFN- $\gamma$  ELISA raw data used in figure 6. NKL transfected to express GFP-tagged KIR3DL1\*002 (left) or KIR3DL1\*004 (right) were incubated with plate-bound mAb for 16 h. Cells were stimulated with 0.5  $\mu$ g/ml 2B4 mAb or isotype-matched control (IgG1). To assess NK cell inhibition through KIR3DL1, 2B4 mAb plus 0.1-1  $\mu$ g/ml mAb 177407 or isotype-matched control (IgG2a) were used. IFN- $\gamma$  release into the supernatant was assessed by ELISA. Data is from n=1 of 4 independent experiments performed in triplicate.*

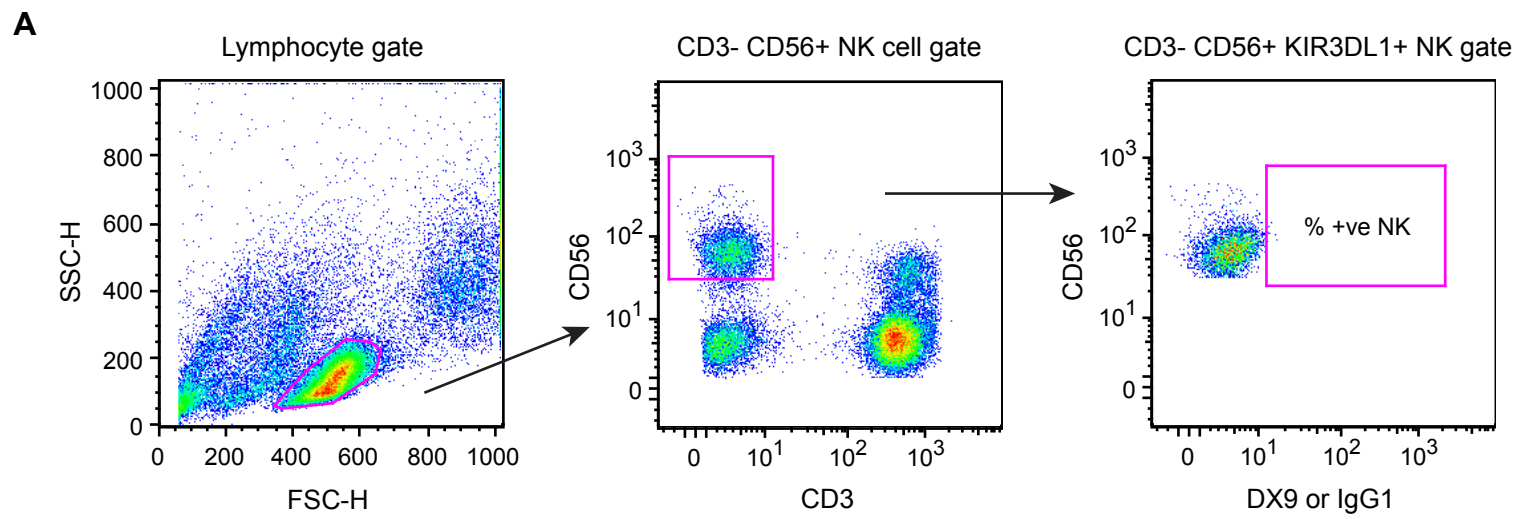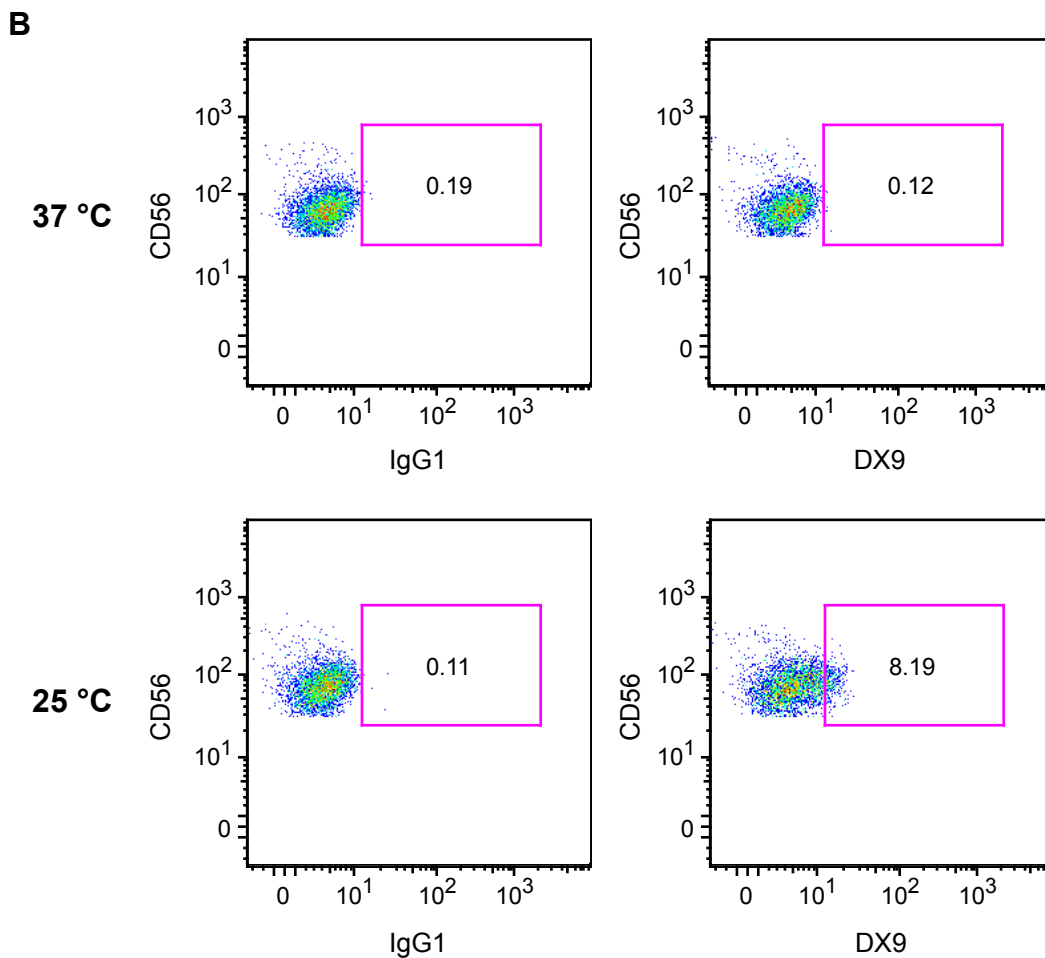

*Supplemental Figure 2 Human PBMC analysis. A, Representative gating strategy for characterizing KIR3DL1+ NK cells. B, Flow cytometry data from KIR3DL1\*004 homozygous donor 102. PBMC were incubated for 16 h at 37 (upper) and 25 (lower) °C. Surface KIR3DL1 protein was stained with mAb DX9 or an isotype-matched control (IgG1). The percentage (numerical values on dot plots) of CD3- CD56+ NK cells stained with mAb was assessed using the gating strategy in A.*
